# Supplementary material
Source: publisher site journal article supplement (https://www.dovepress.com/article/581990)
Supplement: Supplementary file 1 [file 581990%20Supplementary%20Material.pdf]

## Supplementary Materials

### Supplementary figure 1.

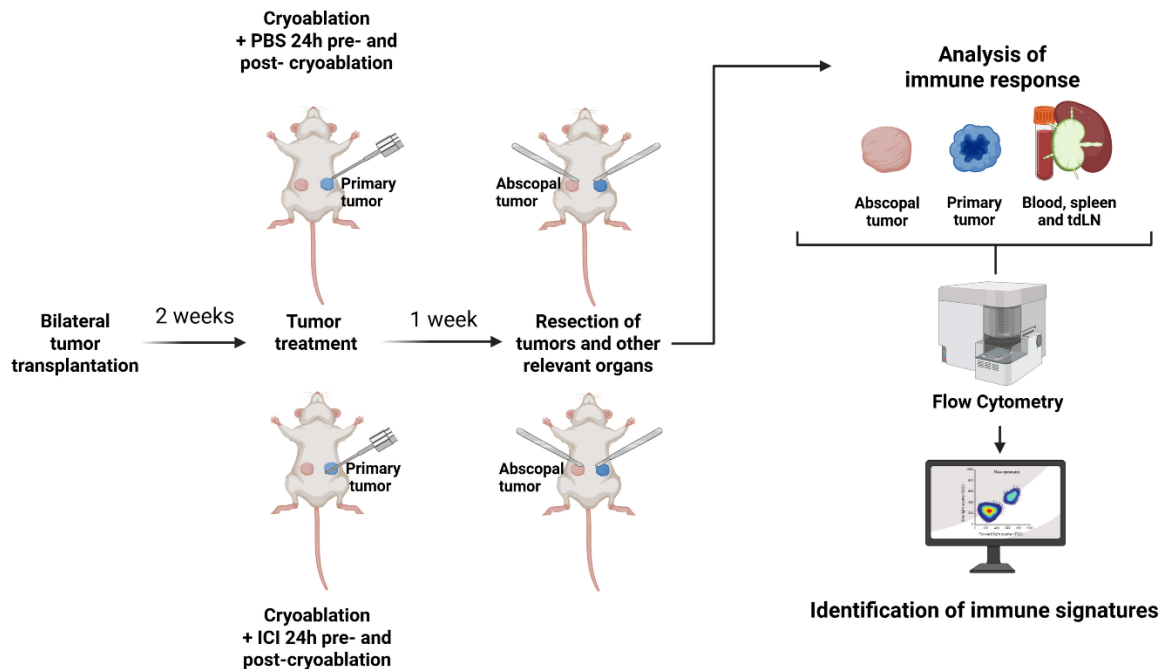

**Supplementary figure 1. Experimental approach.** Naïve BALB/c female mice received a bilateral orthotopic transplantation of one million 4T1-12B luciferase expressing cells and, two weeks later, primary (left) tumors were cryoablated; abscopal (right) tumors were unmanipulated. Twenty-four hours pre- and post-cryoablation, mice were administered PBS or ICIs via intraperitoneal injections. A week after, mice were sacrificed and peripheral blood, spleen, tumors and tumor-draining lymph nodes were collected. Organs were processed to obtain single cells for flow cytometry analysis. Created in BioRender.

Sardela de Miranda, F. (2025) <https://BioRender.com/676r9hv>

## Supplementary figure 2.

**A.**

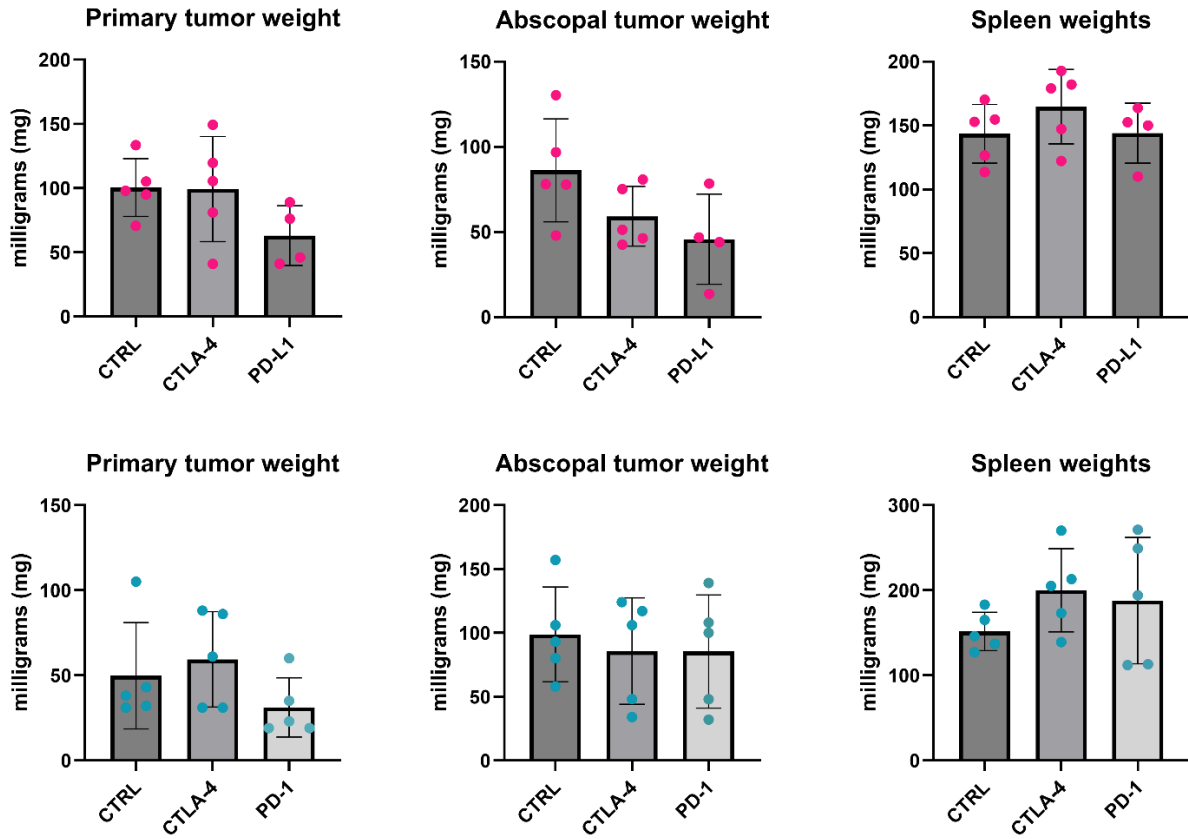

**B.**

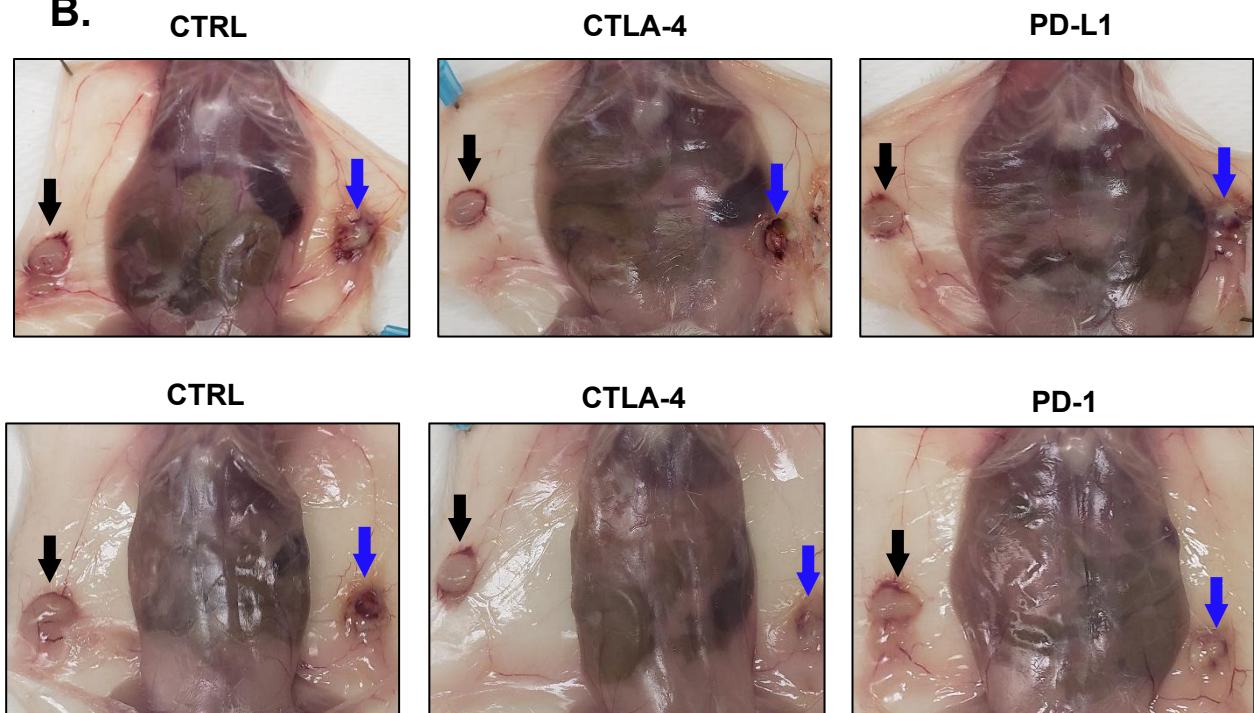

**Supplementary figure 2. Organ weights and tumor size between the different groups one week after cryoablation.** (A) After euthanasia, mouse tumors and spleen were collected and weighed. Pink and blue dots (Top and bottom, respectively), indicate different replicates of the experiment. (B) Representative pictures of Cryoablated tumors (blue arrow) and abscopal tumors (black arrow) in the multiple groups in different replicates of the experiment (Top and bottom, respectively). One-way ANOVA for normally distributed data or Kruskal-Wallis test for non-normally distributed data was performed comparing cryoablation monotherapy to combination with ICIs, with  $p < 0.05$  considered significant. Trends are shown where relevant. CTRL = control, n = 10; CTLA-4 = anti-CTLA-4, n = 10; PD-L1 = anti-PD-L1, n = 5; PD-1 = anti-PD-1, n = 5.

Supplementary figure 3.

**A.**

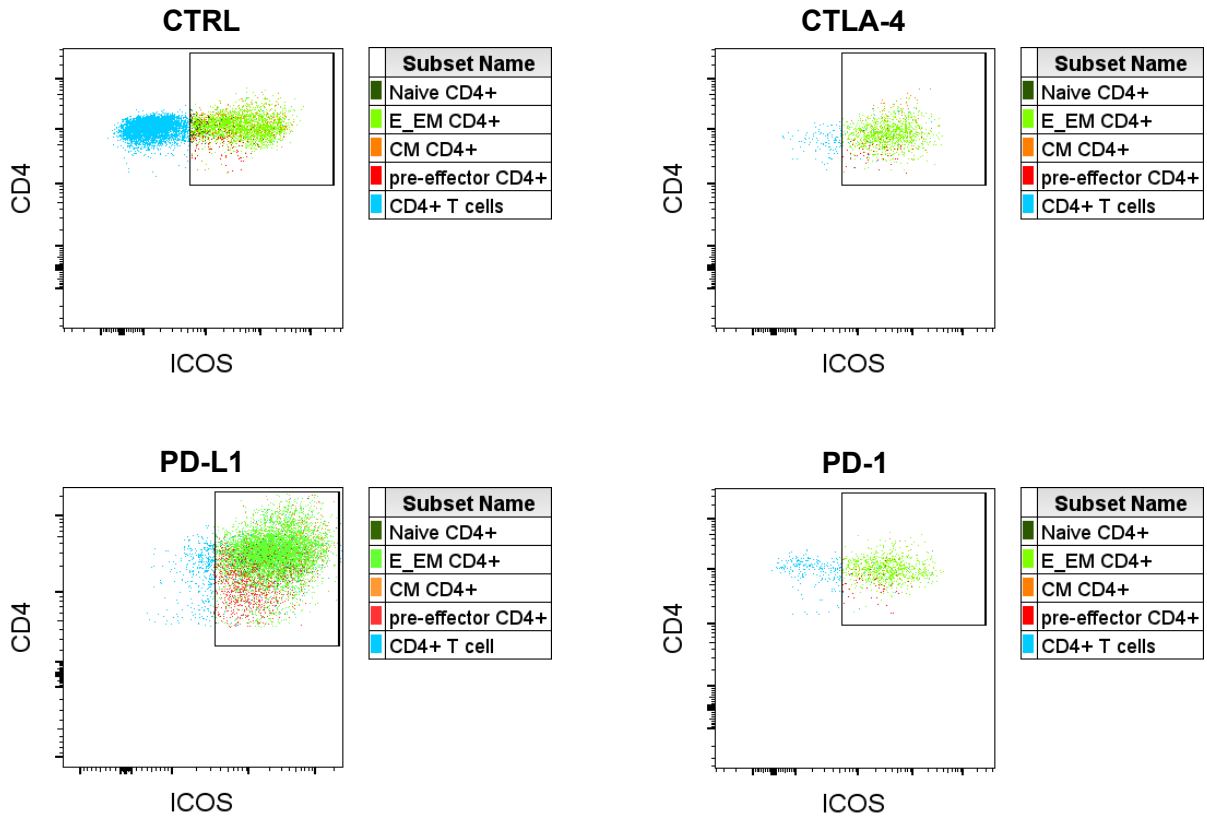

**B.**

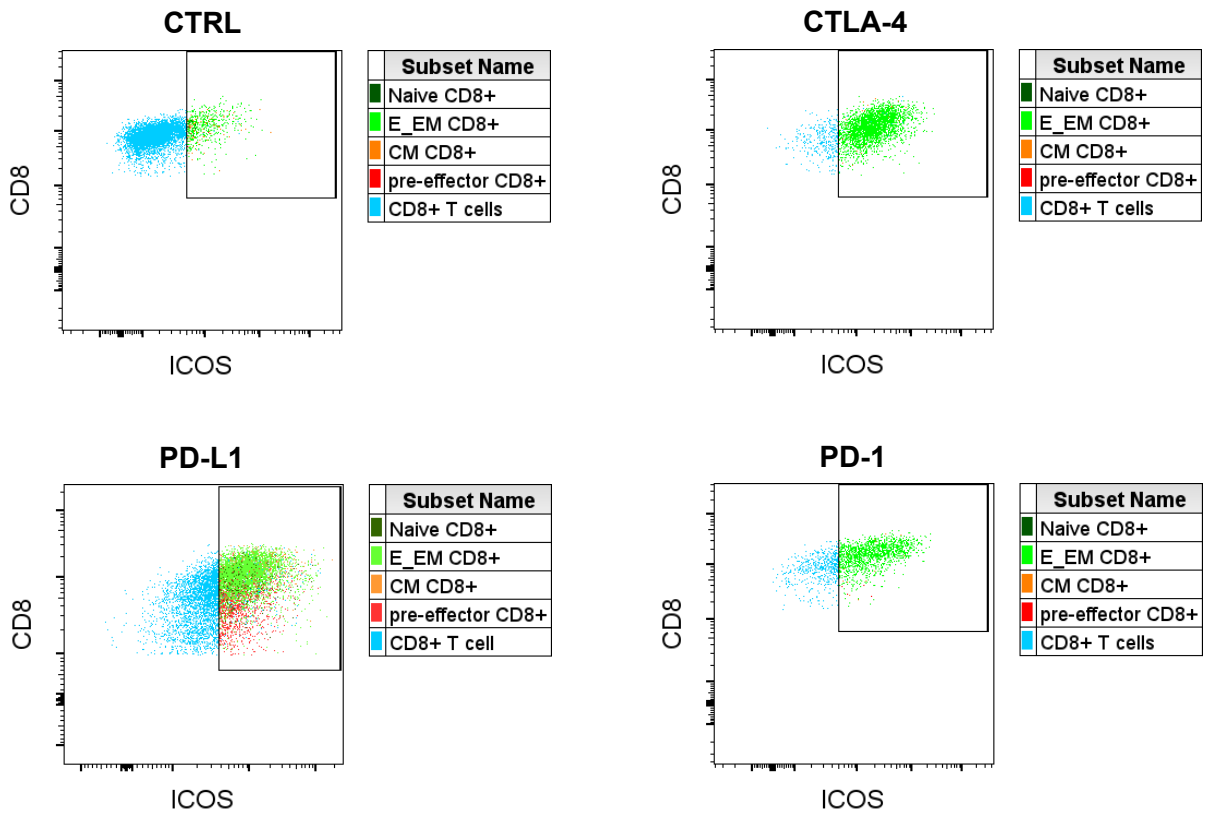

**Supplementary figure 3. Comparison of ICOS<sup>+</sup> T cells expressing effector/effector memory subtype markers.** Representative abscopal tumor dot plots gating on ICOS<sup>+</sup> CD4<sup>+</sup> (A) and CD8<sup>+</sup> (B) T cells; the different colors denote the different subpopulations of T cells, as indicated in the legend provided. E\_EM = effector/effector memory; CM = central memory; CTRL = control; CTLA-4 = anti-CTLA-4; PD-L1 = anti-PD-L1; PD-1 = anti-PD-1.

Supplementary figure 4.

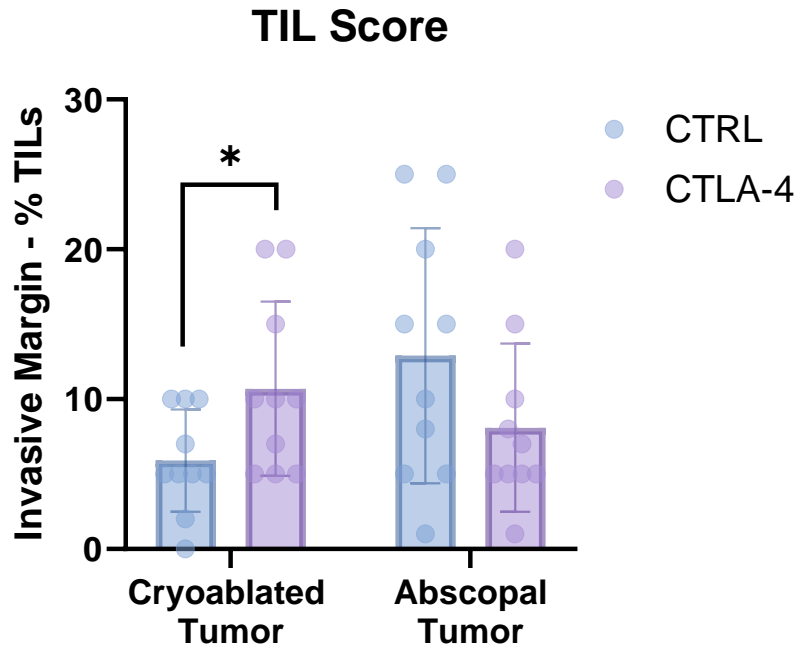

**Supplementary figure 4. Effects of anti-CTLA-4 administration on lymphocyte infiltration of tumors.** TIL score of primary and abscopal tumors. Blue bars represent controls and purple bars represent anti-CTLA-4 treatment. Unpaired Student's t-test for normally distributed data or Mann-Whitney U-test for non-normally distributed data was performed comparing naïve mice to mice treated with anti-CTLA-4 or cryoablation monotherapy to combination with anti-CTLA-4, with  $p < 0.05$  (\*) considered significant. CTRL = control; CTLA-4 = anti-CTLA-4.  $n = 5$  per group.

Supplementary figure 5.

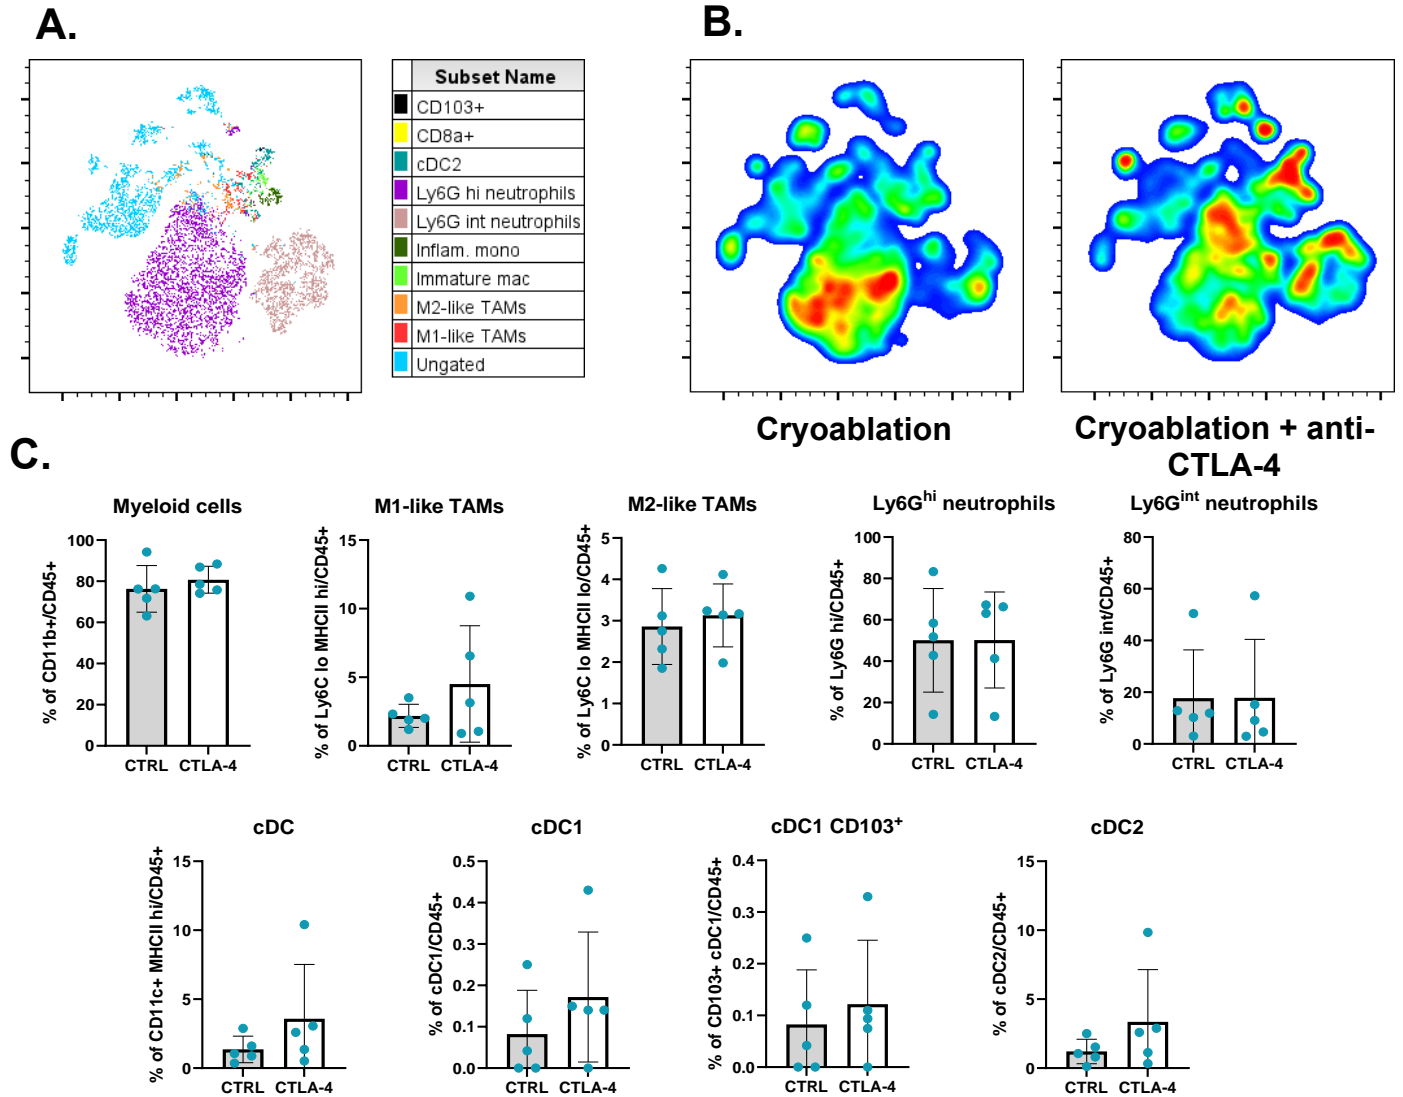

Supplementary figure 5. Myeloid infiltration of primary tumors following CTLA-4

**blockade combined with cryoablation.** (A) Representative tSNE map from one experimental repeat, showing the clustering of different myeloid populations at the primary tumors based on flow cytometry parameters' similarity. (B) Representative tSNE heatmap from one experimental repeat, made from concatenated primary tumors from cryoablation monotherapy versus cryoablation plus anti-CTLA-4. (C) Myeloid populations,

analyzed as frequency of the live immune cells (CD45<sup>+</sup>), at the primary tumors. Unpaired Student's t-test for normally distributed data or Mann-Whitney U-test for non-normally distributed data was performed comparing cryoablation monotherapy to combination with anti-CTLA-4, with  $p < 0.05$  considered significant. TAMs = tumor-associated macrophages; hi = high; int = intermediate; cDC = conventional dendritic cells; CTRL = control; CTLA-4 = anti-CTLA-4. n = 5 per group.

Supplementary figure 6.

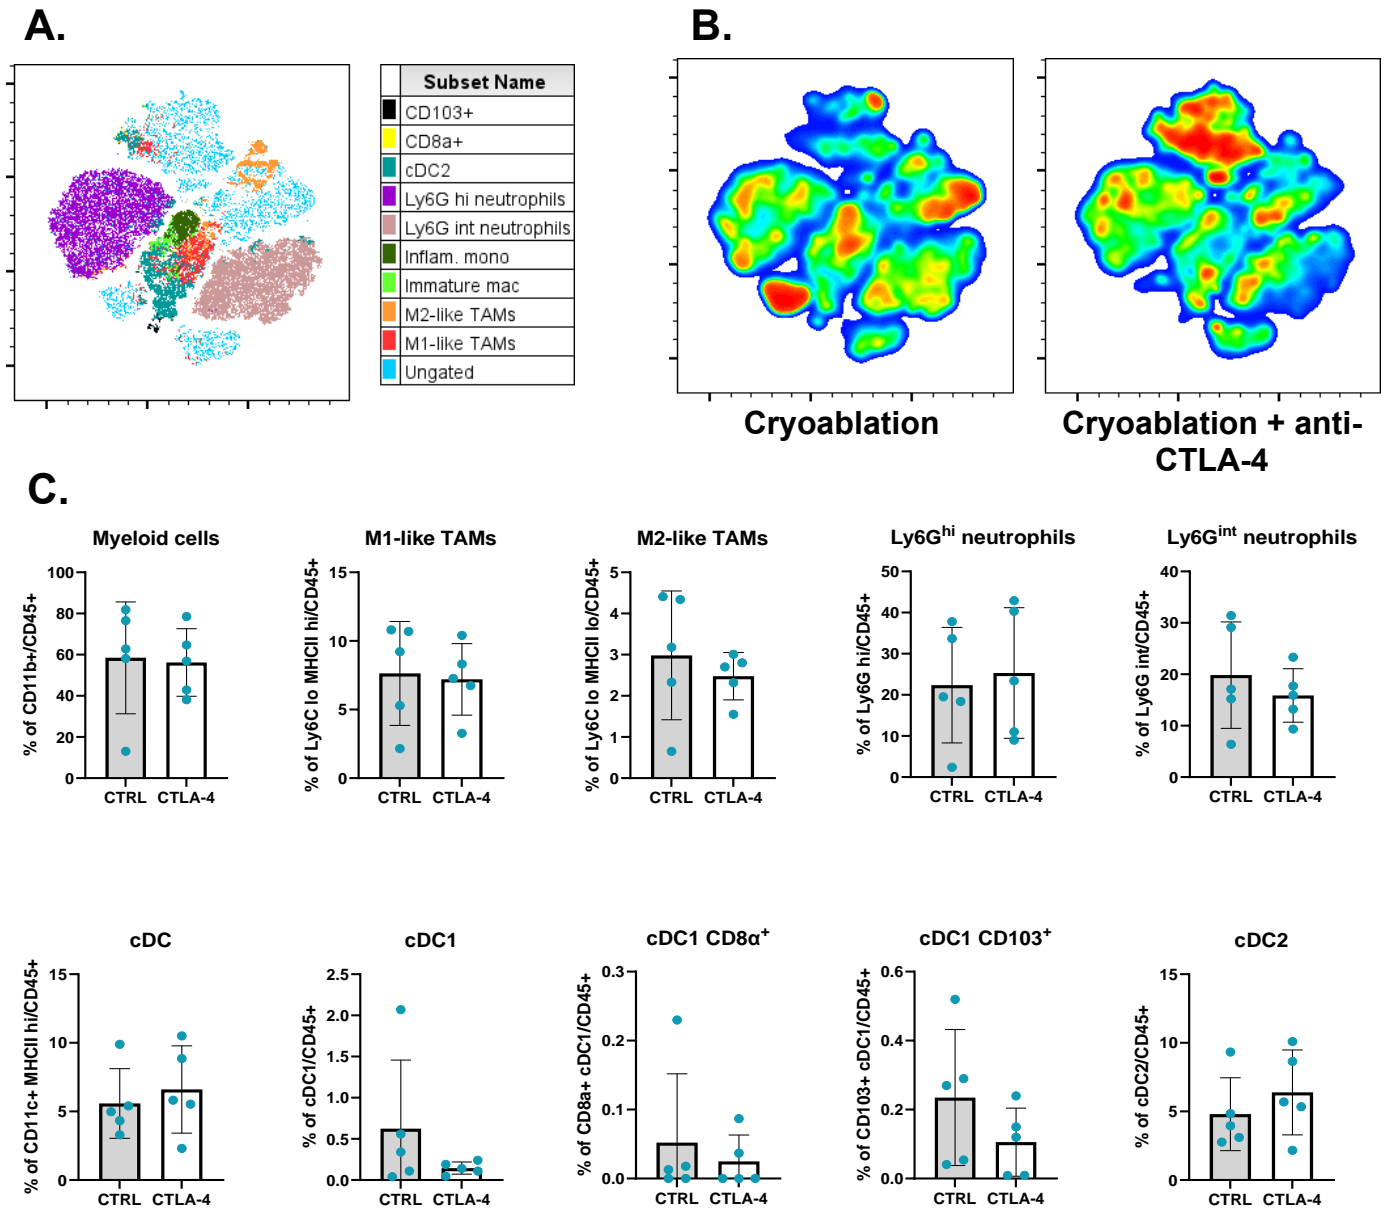

Supplementary figure 6. Myeloid infiltration of abscopal tumors following CTLA-4 blockade combined with cryoablation. (A) Representative tSNE map from one experimental repeat, showing the clustering of different myeloid populations at the abscopal tumors based on flow cytometry parameters' similarity. (B) Representative tSNE

heatmap from one experimental repeat, made from concatenated abscopal tumors from cryoablation monotherapy versus cryoablation plus anti-CTLA-4. (C) Myeloid populations, analyzed as frequency of the live immune cells (CD45<sup>+</sup>), at the abscopal tumors. Unpaired Student's t-test for normally distributed data or Mann-Whitney U-test for non-normally distributed data was performed comparing cryoablation monotherapy to combination with anti-CTLA-4, with  $p < 0.05$  considered significant. TAMs = tumor-associated macrophages; hi = high; int = intermediate; cDC = conventional dendritic cells; CTRL = control; CTLA-4 = anti-CTLA-4. n = 5 per group.

## Supplementary figure 7.

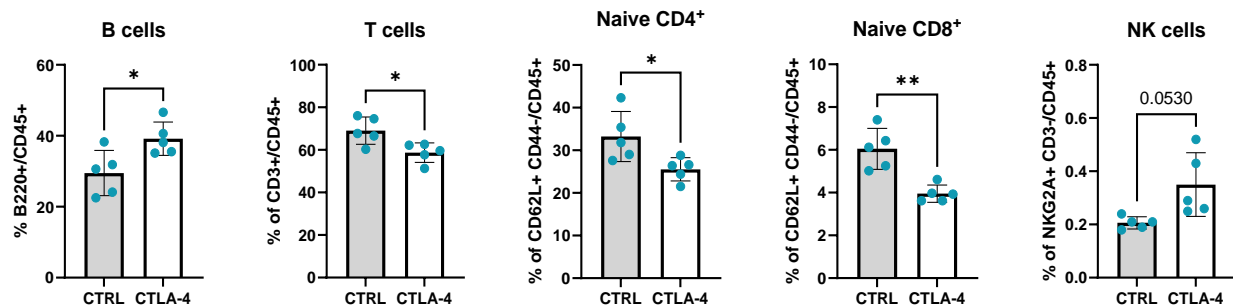

**Supplementary figure 7. Cryoablation plus CTLA-4 blockade decreases the proportion of naïve T cells at the primary TdLN.** Parent immune populations and T cell subpopulations, analyzed as frequency of the live immune cells (CD45<sup>+</sup>), at the primary TdLN. Unpaired Student's t-test for normally distributed data or Mann-Whitney test for non-normally distributed data was performed comparing cryoablation monotherapy to combination with anti-CTLA-4, with  $p < 0.05$  (\*) and  $p < 0.01$  (\*\*) considered significant; trends are shown where relevant. CTRL = control; CTLA-4 = anti-CTLA-4. n = 5 per group.

# Supplementary figure 8.

**A.**

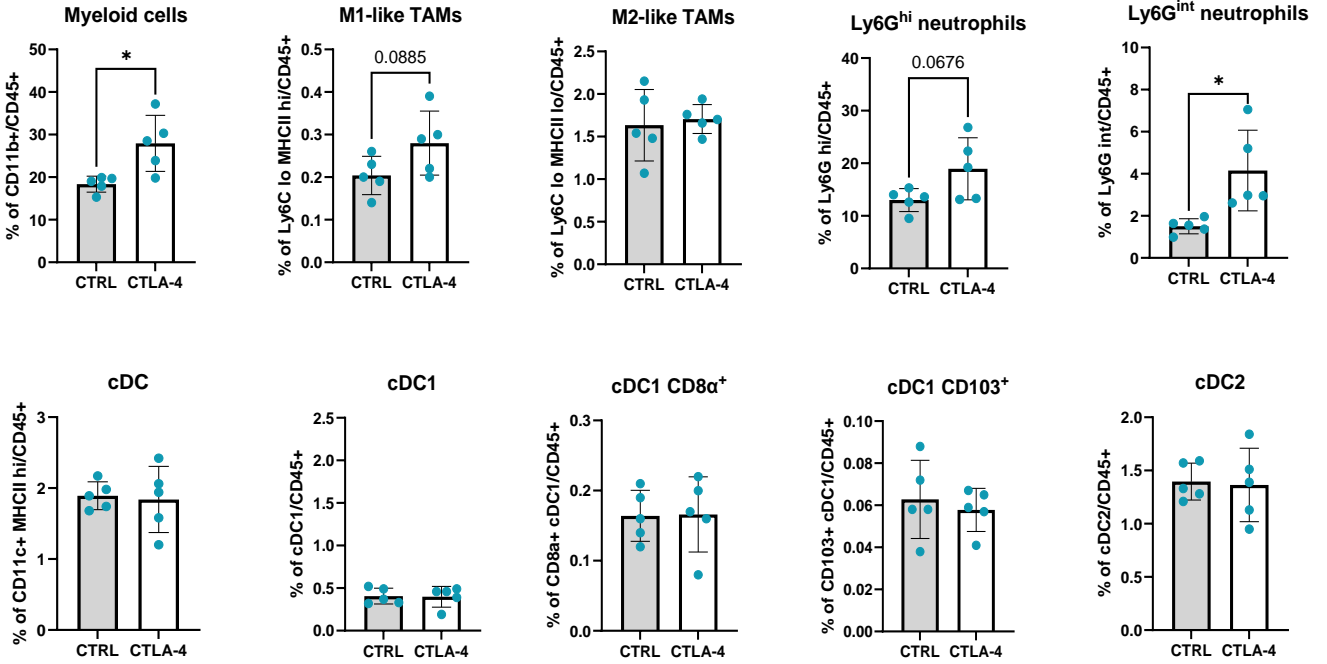

**B.**

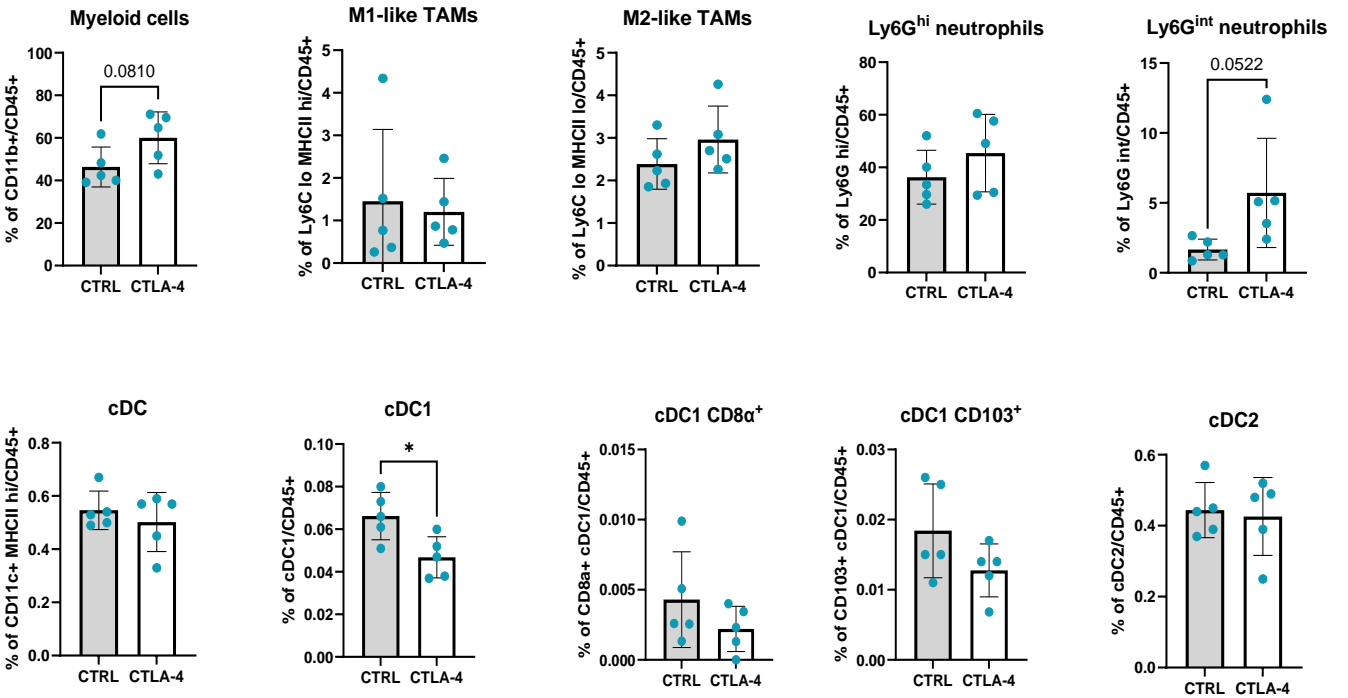

**Supplementary figure 8. Frequency of myeloid cells systemically.** Myeloid cells, analyzed as frequency of the live immune cells (CD45<sup>+</sup>), at the spleen (A) and peripheral blood (B). Unpaired Student's t-test for normally distributed data or Mann-Whitney U-test for non-normally distributed data was performed comparing cryoablation monotherapy to combination with anti-CTLA-4, with  $p < 0.05$  (\*) considered significant. TAMs = tumor-associated macrophages; hi = high; int = intermediate; cDC = conventional dendritic cells; CTRL = control; CTLA-4 = anti-CTLA-4. n = 5.

**Supplementary table 1. Antibodies used for flow cytometry**

|                         | <b>Antibody</b>      | <b>Clone</b>    | <b>Fluorophore</b> | <b>Catalog number</b> | <b>Manufacturer</b> | <b>Concentration</b> |
|-------------------------|----------------------|-----------------|--------------------|-----------------------|---------------------|----------------------|
| <b>Lymphocyte panel</b> | NKG2A                | 20d5            | APC                | 564383                | BD                  | 1:100                |
|                         | CD3                  | 17A2            | APC-Cy7            | 100222                | Biologend           | 1:50                 |
|                         | CD45                 | 30-F11          | AF700              | 103128                | Biologend           | 1:100                |
|                         | B220                 | RA3-6B2         | BV421              | 103240                | Biologend           | 1:50                 |
|                         | ICOS                 | C396.4A         | BV605              | 567920                | BD                  | 1:100                |
|                         | CD8                  | 53-6.7          | BV650              | 100742                | Biologend           | 1:100                |
|                         | CD107a               | 1D4B            | BV711              | 564348                | BD                  | 1:200                |
|                         | CD127                | SB/199          | BV786              | 563748                | BD                  | 1:200                |
|                         | CD11b                | M1/70           | FITC               | 11-0112-85            | eBioscience         | 1:200                |
|                         | CD25                 | PC61            | PE                 | 12-0251-83            | eBioscience         | 1:100                |
|                         | CD62L                | MEL-14          | PE-CF594           | 562404                | BD                  | 1:200                |
|                         | CD4                  | GK1.5           | PE-Cy7             | 25-0041-82            | Invitrogen          | 1:200                |
|                         | CD44                 | IM7             | PerCP-Cy5.5        | 560570                | BD                  | 1:50                 |
|                         | CCR3                 | J073E5          | APC                | 144512                | Biologend           | 1:100                |
|                         | <b>Myeloid Panel</b> | CD8a            | 53-6.7             | APC-Cy7               | 100714              | Biologend            |
| CD45                    |                      | 30-F11          | AF700              | 103128                | Biologend           | 1:50                 |
| XCR1                    |                      | ZET             | BV421              | 148216                | Biologend           | 1:100                |
| Ly6C                    |                      | HK1.4           | BV605              | 128036                | Biologend           | 1:200                |
| MHCII                   |                      | M5/114.1<br>5.2 | BV650              | 107641                | Biologend           | 1:100                |
| IL-5Ra                  |                      | T21             | BV711              | 740817                | BD                  | 1:200                |
| CD103                   |                      | 2E7             | BV785              | 121439                | Biologend           | 1:100                |
| CD11b                   |                      | M1/70           | FITC               | 11-0112-85            | eBioscience         | 1:200                |
| CD172a                  |                      | P84             | PE                 | 144012                | Biologend           | 1:200                |
| Siglec-F                |                      | E-50-2440       | PE-CF594           | 562757                | BD                  | 1:200                |
| CD11c                   |                      | N418            | PE-Cy7             | 117318                | Biologend           | 1:100                |
| Ly6G                    | 1A8                  | PerCP-Cy5.5     | 560602             | BD                    | 1:50                |                      |

**Supplementary table 2. Immune phenotyping by flow cytometry**

|                         | <b>Cell population</b>                   | <b>Expressed markers</b>                                                                                 |
|-------------------------|------------------------------------------|----------------------------------------------------------------------------------------------------------|
| <b>Lymphocyte panel</b> | B cells                                  | B220 <sup>+</sup>                                                                                        |
|                         | Myeloid cells                            | B220 <sup>-</sup> CD3 <sup>-</sup> CD11b <sup>+</sup>                                                    |
|                         | NK cells                                 | B220 <sup>-</sup> CD3 <sup>-</sup> NKG2A <sup>+</sup>                                                    |
|                         | T cells                                  | CD3 <sup>+</sup>                                                                                         |
|                         | CD4 <sup>+</sup> T cells                 | CD3 <sup>+</sup> CD4 <sup>+</sup>                                                                        |
|                         | CD8 <sup>+</sup> T cells                 | CD3 <sup>+</sup> CD8 <sup>+</sup>                                                                        |
|                         | Activated T cells                        | CD3 <sup>+</sup> CD4 <sup>+</sup> /CD8 <sup>+</sup> ICOS <sup>+</sup>                                    |
|                         | Naïve T cells                            | CD3 <sup>+</sup> CD4 <sup>+</sup> /CD8 <sup>+</sup> CD62L <sup>+</sup> CD44 <sup>-</sup>                 |
|                         | Central memory T cells                   | CD3 <sup>+</sup> CD4 <sup>+</sup> /CD8 <sup>+</sup> CD62L <sup>+</sup> CD44 <sup>+</sup>                 |
|                         | Effector/effector memory cells           | CD3 <sup>+</sup> CD4 <sup>+</sup> /CD8 <sup>+</sup> CD62L <sup>-</sup> CD44 <sup>+</sup>                 |
|                         | Pre-effector T cells                     | CD3 <sup>+</sup> CD4 <sup>+</sup> /CD8 <sup>+</sup> CD62L <sup>-</sup> CD44 <sup>-</sup>                 |
|                         | Regulatory T cells                       | CD3 <sup>+</sup> CD4 <sup>+</sup> CD127 <sup>low</sup> CD25 <sup>+</sup>                                 |
| <b>Myeloid Panel</b>    | Conventional dendritic cells             | CD11c <sup>+</sup> CD11b <sup>low/+</sup> MHC-II <sup>high</sup>                                         |
|                         | cDC1                                     | CD11c <sup>+</sup> CD11b <sup>low/+</sup> MHC-II <sup>high</sup> XCR1 <sup>+</sup>                       |
|                         | Resident cDC1                            | CD11c <sup>+</sup> CD11b <sup>low/+</sup> MHC-II <sup>high</sup> XCR1 <sup>+</sup><br>CD8α <sup>+</sup>  |
|                         | Migratory cDC1                           | CD11c <sup>+</sup> CD11b <sup>low/+</sup> MHC-II <sup>high</sup> XCR1 <sup>+</sup><br>CD103 <sup>+</sup> |
|                         | cDC2                                     | CD11c <sup>+</sup> CD11b <sup>low/+</sup> MHC-II <sup>high</sup> CD172 <sup>+</sup>                      |
|                         | Ly6G <sup>high</sup> neutrophils         | CD11b <sup>+</sup> Ly6G <sup>high</sup> Siglec-F <sup>low</sup>                                          |
|                         | Ly6G <sup>intermediate</sup> neutrophils | CD11b <sup>+</sup> Ly6G <sup>intermediate</sup> Siglec-F <sup>high</sup>                                 |
|                         | M1-like TAMs                             | CD11b <sup>+</sup> Ly6C <sup>low</sup> MHC-II <sup>high</sup>                                            |
|                         | M2-like-TAMs                             | CD11b <sup>+</sup> Ly6C <sup>low</sup> MHC-II <sup>low</sup>                                             |
|                         | Inflammatory monocytes                   | CD11b <sup>+</sup> Ly6C <sup>high</sup> MHC-II <sup>low</sup>                                            |
|                         | Immature macrophages                     | CD11b <sup>+</sup> Ly6C <sup>+</sup> MHC-II <sup>high</sup>                                              |
